# Supplementary material for: Pathway complexity in aqueous J-aggregation of an ionic BODIPY amphiphile
Source: Royal Society of Chemistry journal article supplement (doi:10.1039/d4nj02948h), 2024-01-01
Supplement: d4nj02948h1.pdf [file d4nj02948h1.pdf]

# Electronic Supporting Information

## **Pathway complexity in aqueous J-aggregation of an ionic BODIPY amphiphile**

Houchen Wang,<sup>‡ab</sup> Jiajun Liu,<sup>‡a</sup> Hongfei Pan,<sup>a</sup> and Zhijian Chen<sup>\*a</sup>

<sup>a</sup> *School of Chemical Engineering and Technology, Tianjin University, Tianjin, 300072, China.*

<sup>b</sup> *College of Chemistry, Chemical Engineering and Materials Science, Zaozhuang University, Zaozhuang, 277160, China.*

<sup>‡</sup>These authors contributed equally to this work.

E-mail: [zjchen@tju.edu.cn](mailto:zjchen@tju.edu.cn)

## **Table of Contents**

|                                                         |           |
|---------------------------------------------------------|-----------|
| <b>1. Materials and Methods.....</b>                    | <b>3</b>  |
| <b>2. Synthesis and characterization .....</b>          | <b>5</b>  |
| <b>3. Data analysis for spectroscopic studies .....</b> | <b>14</b> |
| <b>4. Aggregation studies .....</b>                     | <b>16</b> |
| <b>5. References.....</b>                               | <b>25</b> |

## 1. Materials and Methods

**Chemicals and reagents:** All the chemicals used were analytical grade and were used without further purification unless otherwise stated.  $\text{CH}_2\text{Cl}_2$  was distilled over  $\text{CaH}_2$  under Ar, and tetrahydrofuran (THF) was distilled over sodium and stored under Ar. Silica gel (200-300 mesh) was used for column chromatography.

**NMR spectroscopy:**  $^1\text{H}$  and  $^{13}\text{C}$  NMR spectra were recorded on Bruker AVANCE III HD (400 MHz) spectrometer using tetramethylsilane (TMS) as internal standard.

**Mass spectrometry:** High resolution mass spectrum (ESI) was measured with a Bruker miorOTOF-QII mass spectrometer.

**UV/Vis spectroscopy:** UV/Vis absorption spectra were recorded by using a UV/Vis spectrophotometer (Agilent Technologies, Cary 300) equipped with a SPV temperature controller. The solvents for spectroscopic studies were spectroscopic grade and deionized  $\text{H}_2\text{O}$  were used as received, and all the UV/V spectra were corrected by the blank solution. The quartz glass cuvettes were used to measurement and the extinction coefficients  $\epsilon$  were calculated according to Lambert-Beer's law:  $A = \epsilon bc$ .<sup>1</sup>

**Fluorescence spectroscopy:** The steady state fluorescence spectra, fluorescence quantum yields, and fluorescence lifetimes were measured on a FLS980 spectrofluorometer (Edinburgh). All of the fluorescence spectra were corrected. For the samples of dye aggregates, the measurements were performed by using a front-face setup to minimize reabsorption. Fluorescence quantum yields were determined under ambient conditions by the integrating sphere on the spectrofluorometer. Fluorescence lifetime measurements were performed on a time-correlated single-photon counting (TCSPC) setup. A nF920 nanosecond flashlamp (pulse width  $<1$  ns) was used as excitation source (200 - 400 nm). A RED PMT photomultiplier (R928P) was used as detector. The instrument response was collected by scattering the excited light of a dilute, aqueous suspension of colloidal silica (Ludox). The lifetime decay curves were analyzed using the software supplied with the instrument. The quality of the data fitting was evaluated by analysis of  $\chi^2$  (0.9–1.1) as well as by inspection of residuals and the autocorrelation function.

**Transmission electron microscopy (TEM):** The TEM measurements were recorded on a JEM-2100F transmission electron microscope. For sample preparation, a drop of aggregates in solution of dye **3** was placed on 400-mesh formvar copper grids coated with carbon. About 2 min after the deposition, the grid was blotted with filter paper to remove solvent. Staining was performed by addition of a drop of uranyl acetate aqueous solution (0.5 %) onto the copper grid. After 1 min, the surface liquid on the grid was removed with filter paper.

**Atomic force microscopy (AFM):** The AFM measurements were performed under ambient conditions using a Bruker Dimension Icon atomic force microscope operating in tapping mode. Silicon cantilevers with a resonance frequency of ~300 kHz were used. The samples of **Agg. I** and **Agg. II** were prepared by drop-casting the solution of dye aggregates ( $2.0 \times 10^{-5}$  M) in H<sub>2</sub>O on mica sheets.

**Dynamic light scattering (DLS) and zeta potential:** The particle size distribution and zeta potential values of dye aggregates in the aqueous solution were measured by a Zetasizer Nano ZS Nanoparticle Size and Zeta Potential Analyzer (4 mW 633 nm helium-neon laser) manufactured by Malvern.

**XRD measurement:** One-dimensional XRD measurement was performed on a Rigaku Smartlab diffractometer with Cu K $\alpha$  source operating at 45 kV and 200 mA. The experiments were performed at a sample-detector distance of 21 cm, with the detector tilted by 14° upward in order to study the angular range of  $2\theta = 0.5^\circ$ -25°. The samples were prepared by evaporation of the concentrated **Agg. I** and **Agg. II** solution in H<sub>2</sub>O on glass slide.

## 2. Synthesis and characterization

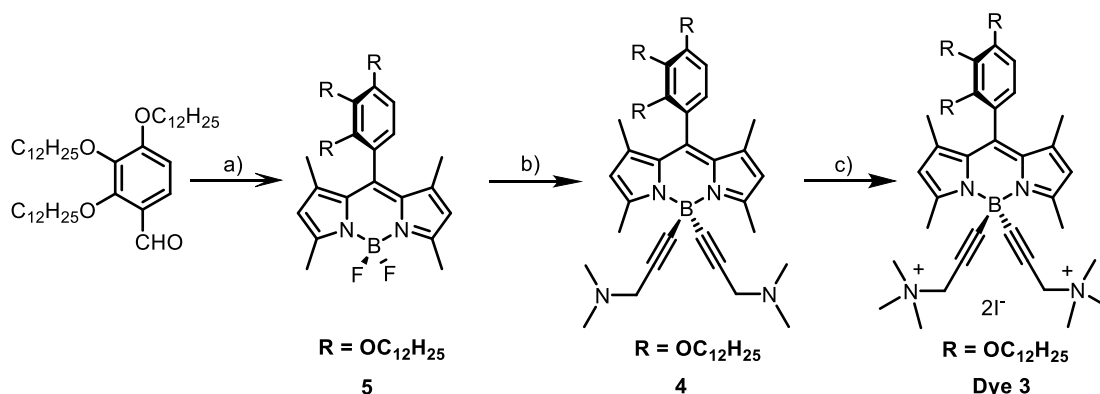

**Scheme 1** Synthesis of amphiphile BODIPY dye **3**. Reagents and conditions: a)  $\text{CF}_3\text{COOH}$ , 2,4-Dimethylpyrrole,  $\text{CH}_2\text{Cl}_2$ , r.t., 30min; DDQ, 30 min; DIEA,  $\text{BF}_3 \cdot \text{Et}_2\text{O}$ , 2 h; b)  $\text{EtMgBr}$ , THF, 1-dimethylamino-2-propyne,  $60^\circ\text{C}$ , 0.5 h; c)  $\text{Et}_2\text{O}$ ,  $\text{CH}_3\text{I}$ , 20 h.

**Compound 5:** 2,3,4-tris(dodecyloxy)benzaldehyde (2.63 g, 4 mmol, 1 eq) and 2,4-dimethylpyrrole (0.84 g, 8.84 mmol, 2.21 eq) were dissolved in dry  $\text{CH}_2\text{Cl}_2$  (50 mL) under Ar. After 5 min, TFA (0.10 mL) was added, and the reaction was continued at room temperature for about another 15 min. After the complete consumption of aldehyde (monitored by TLC), DDQ (0.95 g, 4 mmol, 1 eq) was added into the reaction mixture. Then the reaction was continued for 0.5 h, N, N-Diisopropylethylamine (7 mL) and  $\text{BF}_3 \cdot \text{Et}_2\text{O}$  (7 mL) were added subsequently. The reaction mixture was carried out at room temperature for 2 h. Then the solvent was evaporated under reduced pressure and the residue was purified by column chromatography (silica gel,  $\text{CH}_2\text{Cl}_2/n\text{-Hexane} = 1/1$ , v/v) to give an orange-colored substance **3-1** (1.21 g, Y = 34.47%).  $^1\text{H NMR}$  (400 MHz,  $\text{CDCl}_3$ ):  $\delta = 6.77$  (d,  $J = 8.5$  Hz, 1H), 6.72 (d,  $J = 8.5$  Hz, 1H), 5.95 (s, 2H), 3.97 (m, 6.4 Hz, 6H), 2.54 (s, 6H), 1.91 - 1.80 (m, 2H), 1.80 - 1.70 (m, 2H), 1.54 (s, 6H), 1.44 - 1.00 (m, 56H), 0.88 (t, 9H).  $^{13}\text{C NMR}$  (101 MHz,  $\text{CDCl}_3$ ):  $\delta = 154.79$ , 154.52, 150.62, 142.55, 142.37, 132.08, 123.42, 121.42, 120.82, 108.56, 77.33, 77.01, 76.69, 73.59, 68.84, 31.94, 30.34, 30.29, 29.70, 29.64, 29.57, 29.48, 29.38, 26.15, 25.74, 22.70, 14.57, 14.21, 14.11.

**Compound 4:** To a solution of 1-dimethylamino-2-propyne (0.56 g, 4.34 mmol, 8.5 eq) in dry THF (4 mL) under Ar in a flask,  $\text{EtMgBr}$  (1.0 M in THF, 4.08 mL, 4.08 mmol, 8 eq) was added and the mixture was stirred at  $55^\circ\text{C}$  for 2 h. Compound **5** (0.45 g, 0.51 mmol, 1 eq) was dissolved in dry THF (2 mL) under Ar, and then the solution of the Grignard reagent was transferred via a cannula to the solution of BODIPY **5**. After the reaction was complete monitored by TLC,  $\text{H}_2\text{O}$  (30 mL) was added. The mixture was extracted with  $\text{CH}_2\text{Cl}_2$  (20 mL  $\times$  3), dried by  $\text{Na}_2\text{SO}_4$ , and then concentrated in vacuo. The residue was purified by column chromatography (silica gel,  $\text{CH}_2\text{Cl}_2/\text{MeOH} = 3/1$ , v/v) to give a dark-orange solid (0.38 g, Y = 74.51%).  $^1\text{H NMR}$  (400 MHz,  $\text{CDCl}_3$ ):  $\delta = 6.80$  (d,  $J = 8.5$  Hz, 1H), 6.72 (d,  $J = 8.5$  Hz, 1H), 5.99 (s, 2H), 3.97 (m, 6H), 3.27 (d,  $J = 3.1$  Hz, 4H), 2.76 (s, 6H), 2.33 (d,  $J = 13.8$  Hz, 12H), 1.90 - 1.81 (m, 2H), 1.79 - 1.69 (m, 2H),

1.54 (s, 6H), 1.43 - 0.99 (m, 56H), 0.88 (t,  $J = 6.7$  Hz, 9H).  $^{13}\text{C}$  NMR (101 MHz,  $\text{CDCl}_3$ ):  $\delta = 154.56, 154.50, 150.93, 146.01, 142.36, 140.57, 138.85, 130.37, 123.83, 122.06, 121.30, 108.55, 77.54, 77.28, 77.03, 73.77, 68.98, 49.17, 49.06, 44.33, 44.25, 44.05, 32.18, 32.17, 30.55, 30.39, 30.02, 29.98, 29.97, 29.95, 29.93, 29.91, 29.88, 29.81, 29.76, 29.72, 29.64, 29.63, 29.62, 29.60, 26.39, 25.90, 22.94, 16.41, 14.68, 14.37$ .

**Dye 3:** Compound **4** (0.30 g, 0.30 mmol, 1 eq) was stirred in dry diethyl ether, and then iodomethane (0.43 g, 3.00 mmol, 10 eq) was added to the mixture in dark at 30 °C. The stirring was continued for overnight. After the reaction was complete, the precipitated solid was isolated by filtration, and then washed by diethyl ether. The compound was recrystallized by  $\text{CH}_2\text{Cl}_2$  and  $\text{Et}_2\text{O}$ , and obtained orange colored powder (0.29 g,  $Y = 74.36\%$ ).  $^1\text{H}$  NMR (400 MHz,  $\text{CDCl}_3$ ):  $\delta = 6.82$  (d,  $J = 8.5$  Hz, 1H), 6.75 (d,  $J = 8.7$  Hz, 1H), 6.09 (s, 2H), 4.72 (d,  $J = 29.8$  Hz, 4H), 4.02 (t,  $J = 6.2$  Hz, 2H), 3.99 - 3.89 (m, 4H), 3.51 (d,  $J = 3.7$  Hz, 18H), 2.73 (s, 6H), 1.90 - 1.82 (m, 2H), 1.78 - 1.72 (m, 2H), 1.55 (d,  $J = 13.3$  Hz, 6H), 1.51 - 1.01 (m, 56H), 0.88 (dd,  $J = 7.3, 5.4$  Hz, 9H).  $^{13}\text{C}$  NMR (101 MHz,  $[\text{D}_6]\text{DMSO}$ ):  $\delta = 154.61, 154.54, 153.84, 150.07, 147.17, 142.07, 141.39, 140.97, 139.55, 135.95, 130.11, 124.97, 123.73, 122.84, 122.20, 120.73, 73.17, 56.72, 52.34, 52.15, 40.66, 40.45, 40.24, 40.03, 39.83, 39.62, 39.41, 31.81, 30.22, 29.89, 29.59, 29.56, 29.48, 29.42, 29.34, 29.27, 29.24, 28.92, 26.22, 26.08, 25.49, 22.58, 16.28, 14.40, 14.38, 14.35$ . HRMS (ESI, positive mode): calculated for  $\text{C}_{67}\text{H}_{113}\text{BN}_4\text{O}_3^{2+}$  1032.8895, found:  $m/z$   $[\text{M}]^{2+}$  516.4469. UV/Vis ( $\text{CH}_2\text{Cl}_2$ ):  $\lambda_{\text{max}}$  ( $\epsilon$ ) = 504 nm ( $9.15 \times 10^{-5} \text{ M}^{-1} \text{ cm}^{-1}$ ). Fluorescence ( $\text{CH}_2\text{Cl}_2$ ):  $\lambda_{\text{max}} = 521$  nm; quantum yield:  $\Phi_{\text{monomer}} = 32.71\%$  ( $\text{CH}_2\text{Cl}_2$ ), lifetime:  $\tau_{\text{monomer}} = 3.1$  ( $\text{CH}_2\text{Cl}_2$ ).

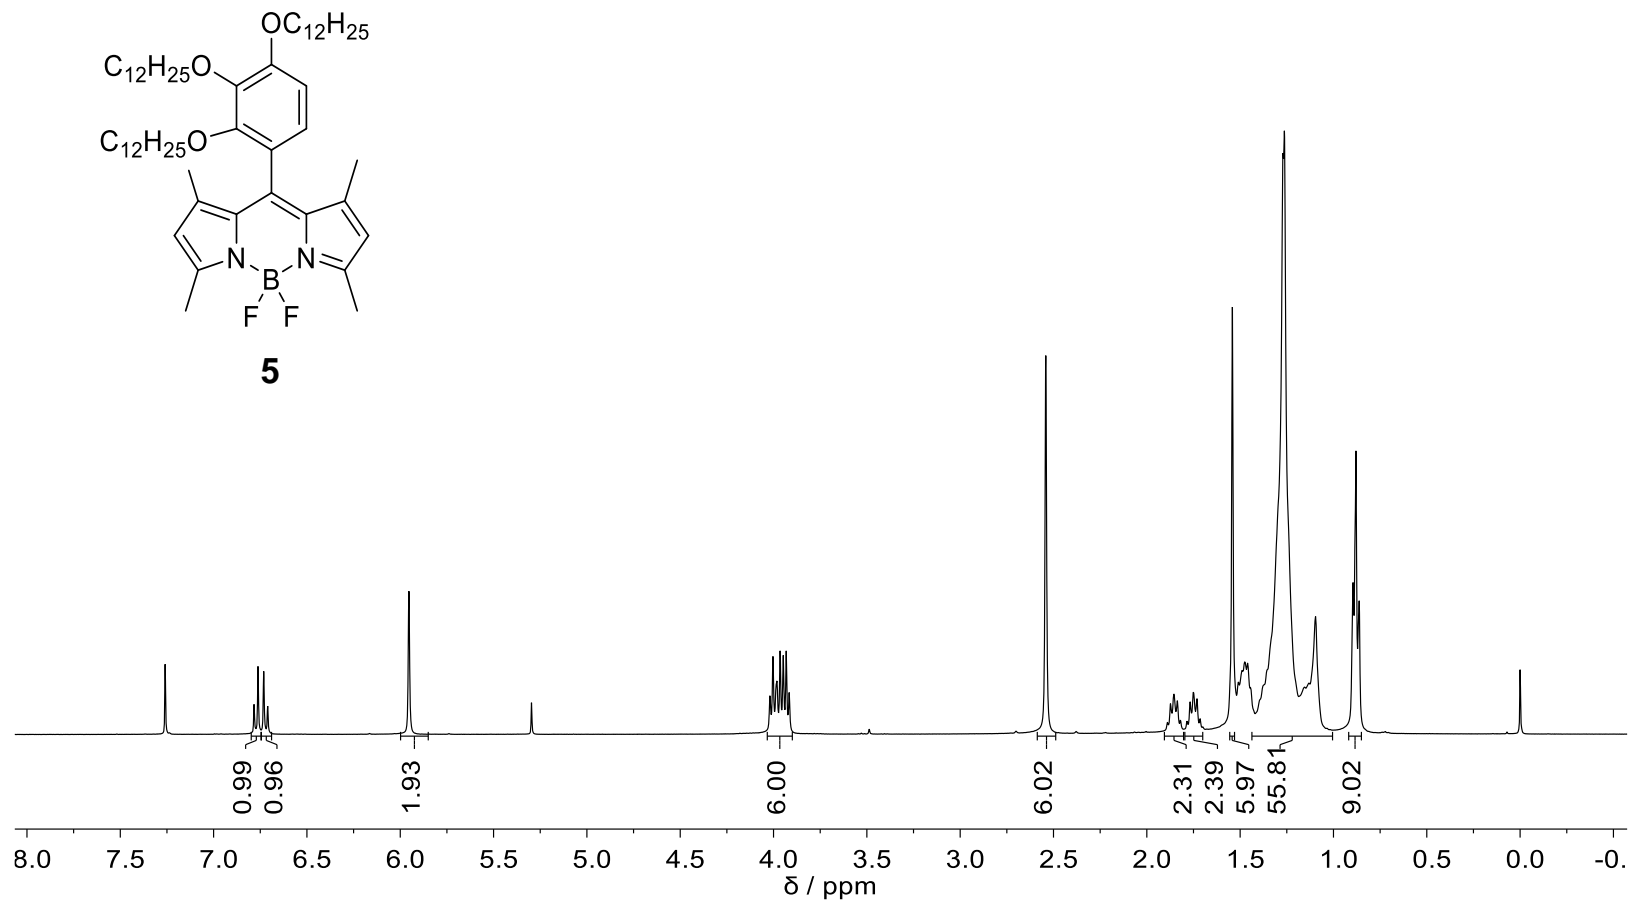

Fig. S1 The  $^1\text{H}$  NMR spectrum (400 MHz) with chemical molecular structure of compound **5** in  $\text{CDCl}_3$  at 293 K.

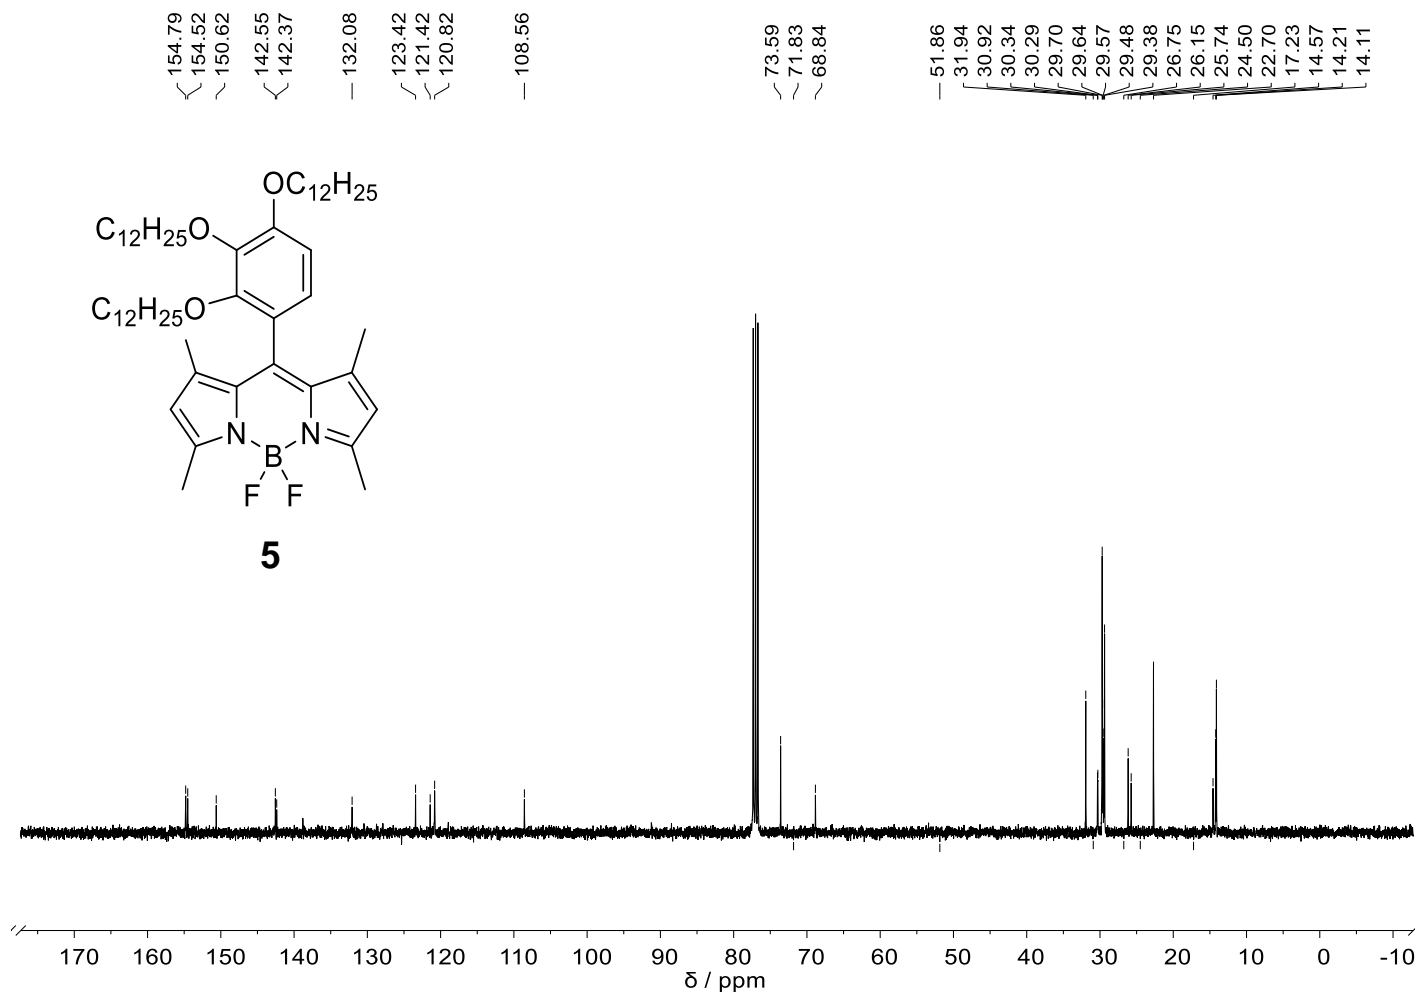



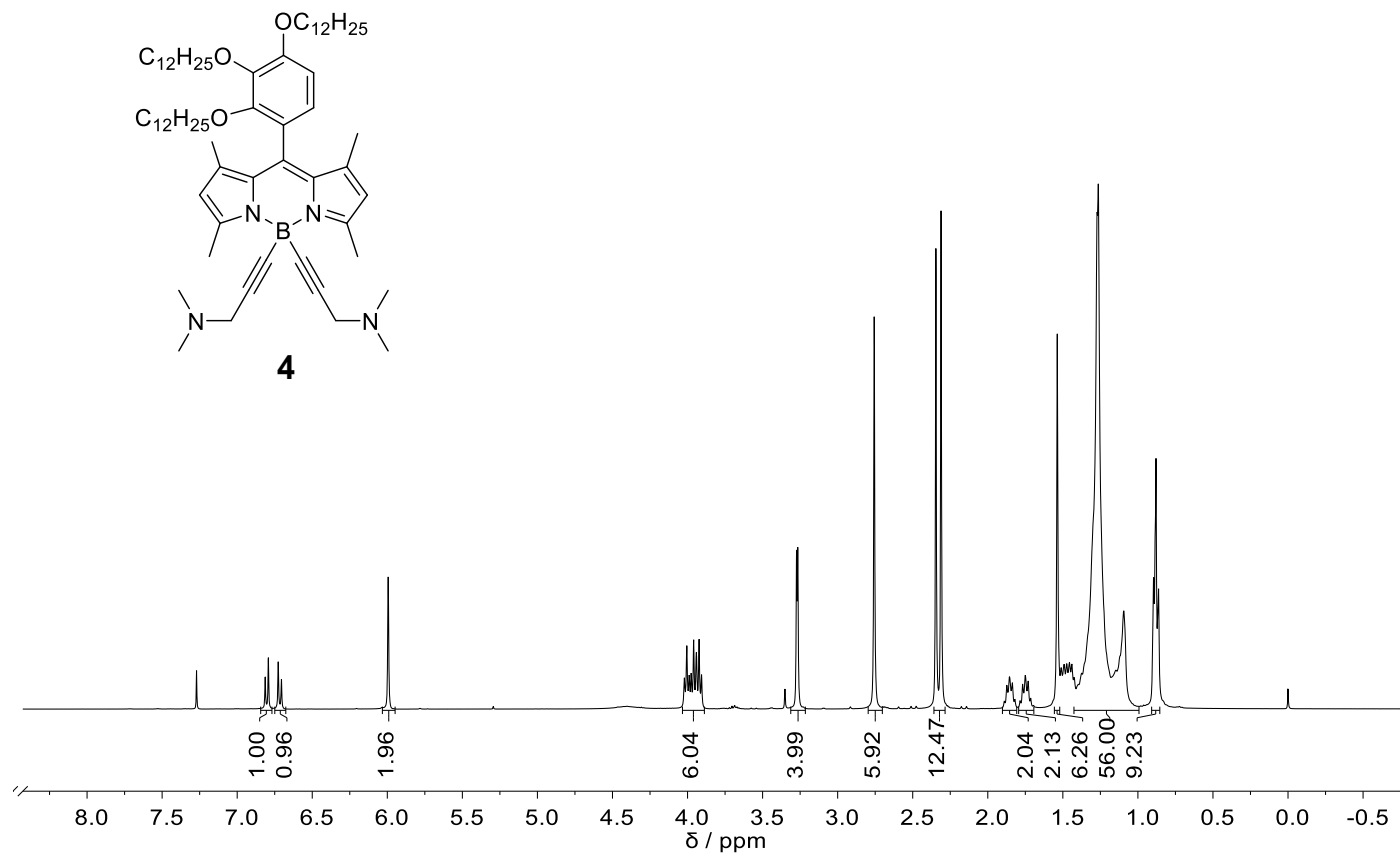

**Fig. S3** The  $^1H$  NMR spectrum (400 MHz) with corresponding assignments of compound **4** in  $CDCl_3$  at 293 K.

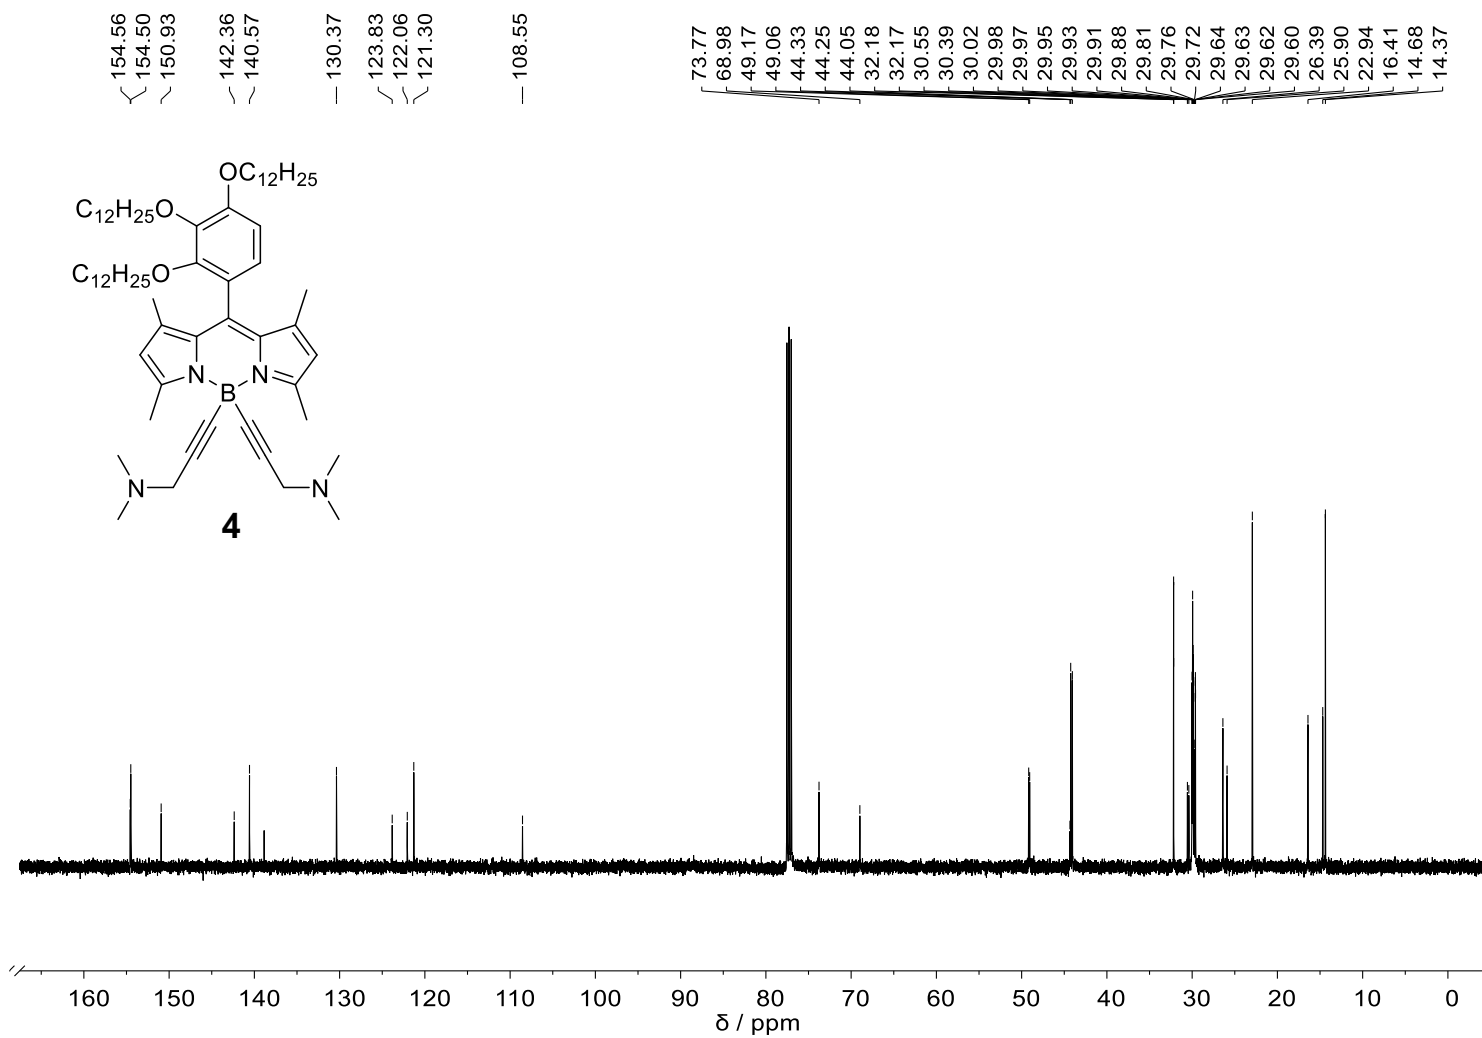

**Fig. S4** The <sup>13</sup>C NMR spectrum (101 MHz) of compound **4** in CDCl<sub>3</sub> at 293 K.

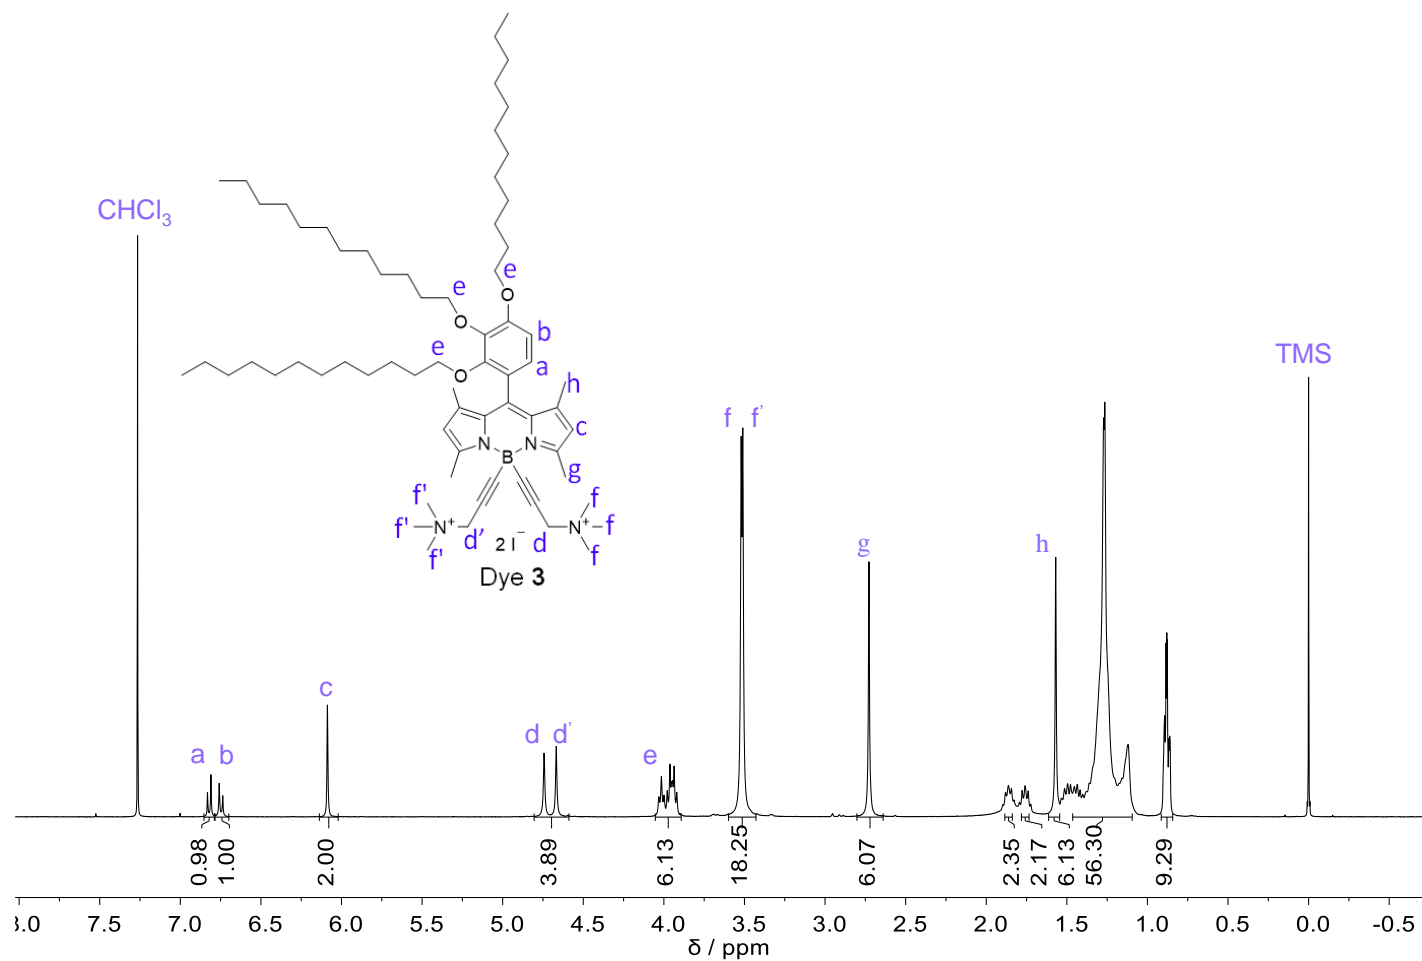

**Fig. S5** The  $^1\text{H}$  NMR spectrum (400 MHz) with corresponding assignments of dye **3** in  $\text{CDCl}_3$  at 293 K.

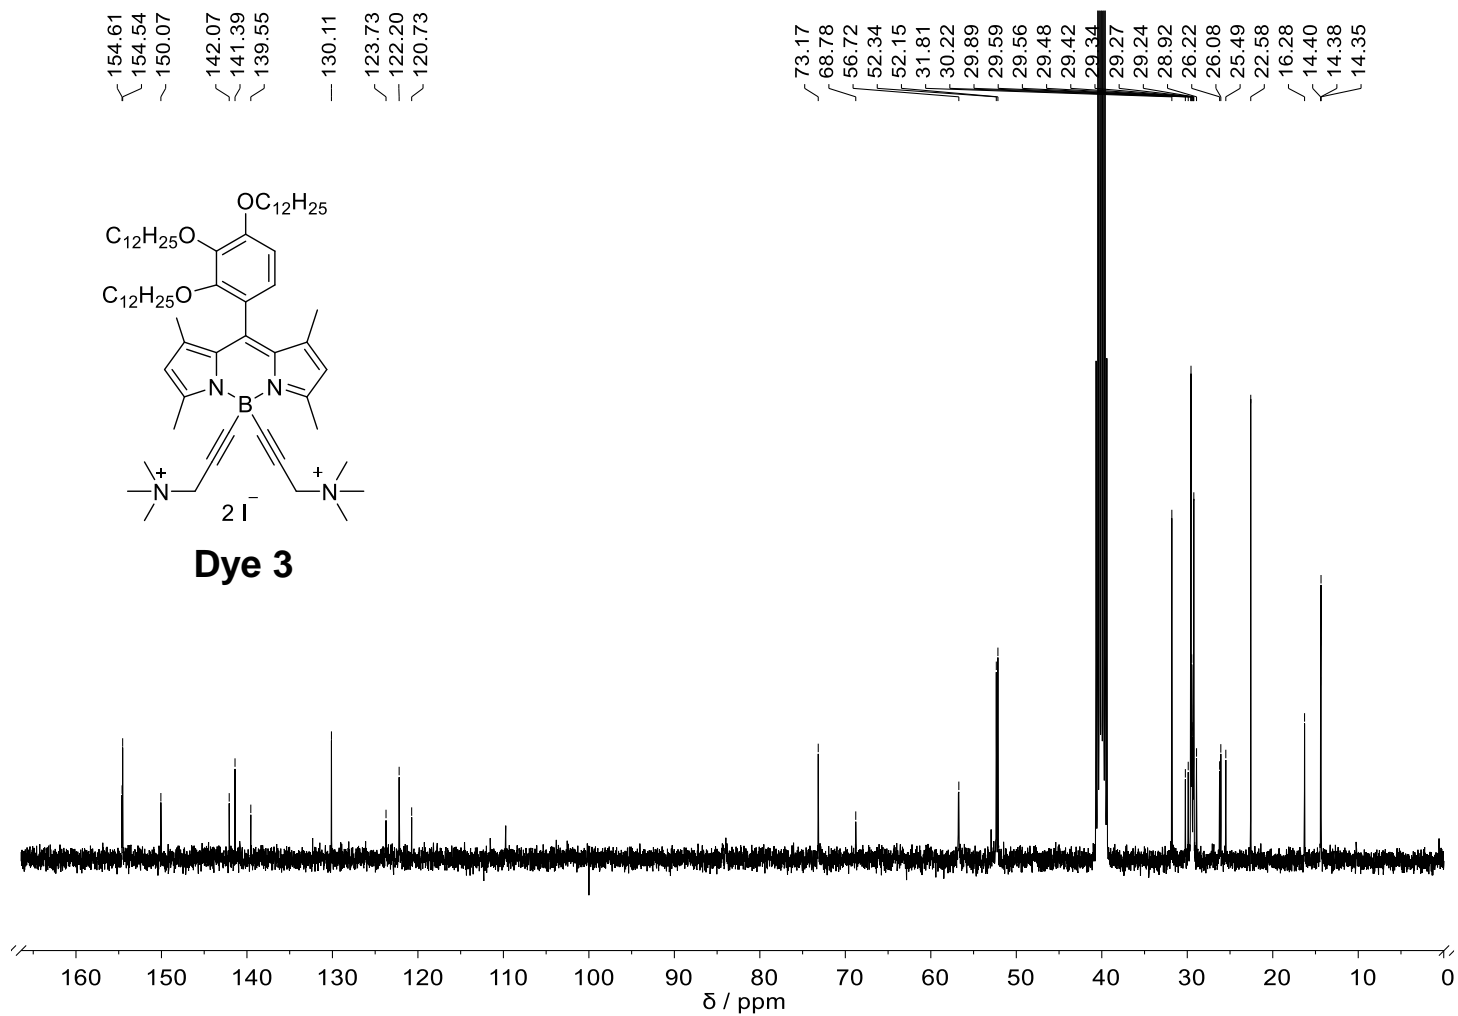

**Fig. S6** The  $^{13}C$  NMR spectrum (101 MHz) of dye 3 in  $[D_6]$  DMSO at 293 K.

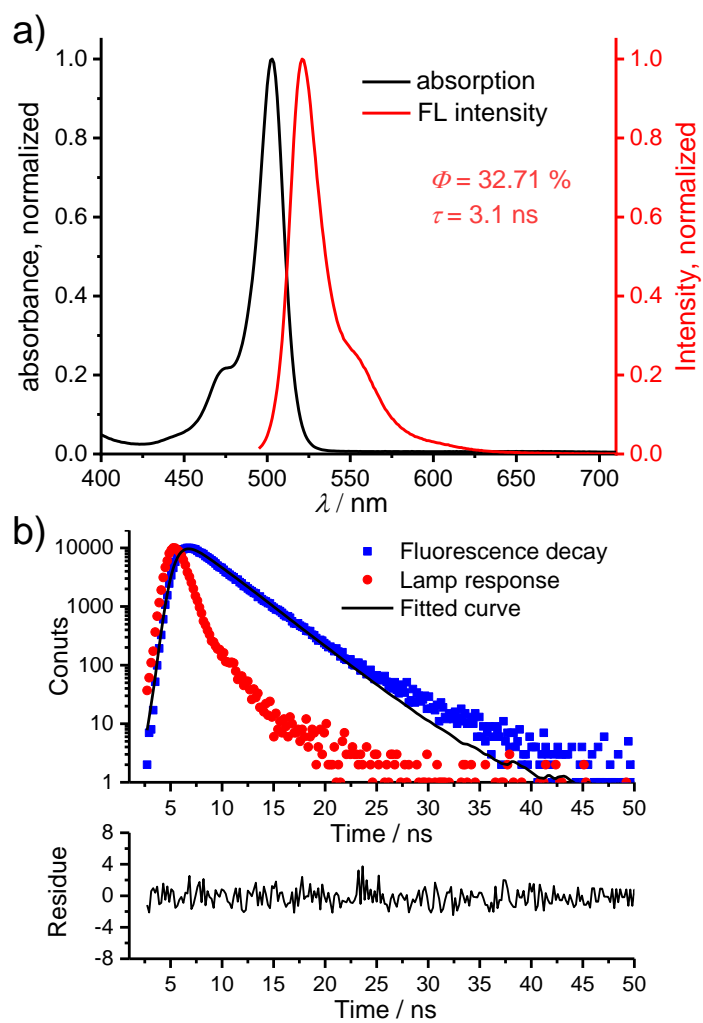

**Fig. S7** a) UV/Vis absorption (black line) and fluorescence spectrum (red line) of dye **3** in  $\text{CH}_2\text{Cl}_2$  ( $1.0 \times 10^{-6} \text{ M}$ ,  $\lambda_{\text{ex}} = 480 \text{ nm}$ ). b) Fluorescence lifetime of monomer of dye **3** in  $\text{CH}_2\text{Cl}_2$  ( $c_T = 1 \times 10^{-6} \text{ M}$ ) at 293 K. The curves were fitted with single-exponential decay function.  $\lambda_{\text{ex}} = 366 \text{ nm}$ ,  $\lambda_{\text{em}} = 521 \text{ nm}$ .  $\tau_{\text{Mon}} = 3.1 \text{ ns}$ ,  $\chi^2 = 1.038$ .

### 3. Data analysis for spectroscopic studies

#### Temperature-dependent spectroscopic measurements

The temperature-dependent spectroscopic data were evaluated by the nucleation-elongation model proposed by Meijer and coworkers.<sup>2</sup> The fraction of aggregated molecules  $\alpha_{\text{Agg}}$  at a certain concentration and temperature can be estimated based on the assumption that the dye molecules aggregate fully ( $\alpha_{\text{Agg}} = 1$ ) at lowest temperature ( $T = 275$  K) or highest concentration ( $c = 5 \times 10^{-4}$  M) and stay in monomers ( $\alpha_{\text{Agg}} = 0$ ) at highest temperature ( $T = 333$  K) or lowest concentration ( $c = 5 \times 10^{-7}$  M) in H<sub>2</sub>O,  $\varepsilon_{\text{Mon}}$  and  $\varepsilon_{\text{Agg}}$  stands for absorption coefficients of the monomer and fully aggregated state respectively.

For **Agg. II**, during heating process, where two species, i.e., the monomer and **Agg. II**, are involved, the fraction of aggregated molecules at certain temperature  $T$  can be calculated according to Eq. S1:

$$\alpha_{\text{Agg}} = 1 - \frac{\varepsilon - \varepsilon_{\text{Agg}}}{\varepsilon_{\text{Mon}} - \varepsilon_{\text{Agg}}} \quad (\text{S1})$$

For the nucleation-growth model, the cooperative aggregation process can be described as two steps: nucleation and elongation. In the elongation regime, the molar fraction of aggregated dye ( $\alpha_{\text{agg}}$ ) can be expressed as equation (S2):

$$\alpha_{\text{Agg}} = \alpha_{\text{SAT}} \left\{ 1 - \exp \left[ \frac{-\Delta H_e}{RT_e^2} (T - T_e) \right] \right\} \quad (\text{S2})$$

Here,  $\Delta H_e$  is the enthalpy corresponding to elongation regime,  $T$  is the temperature,  $T_e$  is the elongation temperature,  $R$  is the ideal gas constant and  $\alpha_{\text{SAT}}$  is a parameter introduced to ensure that  $\alpha_{\text{agg}} / \alpha_{\text{SAT}}$  does not exceed unity.

At the temperature above  $T_e$  (nucleation regime), the fraction of aggregated molecules in the nucleation regime can be described as equation (S3):

$$\alpha_{\text{Agg}} = K_a^{1/3} \exp \left[ (2/3 K_a^{-1/3} - 1) \frac{\Delta H_e}{RT_e^2} (T - T_e) \right] \quad (\text{S3})$$

In this equation,  $\Delta H_e$ ,  $T$  and  $T_e$  are the same as equation (S2) and  $K_a$  is the dimensionless equilibrium constant of the activation.

The average length of the stack  $N_n$  at the  $T_e$  is given by equation (S4).

$$N_n(T_e) = \frac{1}{K_a^{1/3}} \quad (\text{S4})$$

## Concentration-dependent spectroscopic measurements

The concentration-dependent spectroscopic data were evaluated by the cooperative supramolecular polymerization model proposed by Goldstein and Stryer.<sup>3</sup> In this model, a nucleus of size  $s$  is formed in the nucleation regime through an isodemic process with an equilibrium constant  $K_s$  while further steps of adding more molecules to the nucleus take place with equal equilibrium constant  $K$  ( $K > K_s$ ), i.e.  $K_1 = K_2 = \dots = K_s$  and  $K_{s+1} = K_{s+2} = \dots = K$ . The cooperativity is reflected by the parameter  $\sigma$  defined as  $\sigma = K_s / K$ . The relation between  $Kc_T$  and  $Kc_1$  can be described as the equation (S5), where  $c_1$  is the concentration of the monomer species and  $c_T$  is the total concentration of the molecules:

$$Kc_T = \sum_{n=1}^s n\sigma^{n-1}(Kc_T)^n + \sum_{n=s+1}^{\infty} n\sigma^{s-1}(Kc_T)^n = \frac{s(Kc_1)^s \sigma^{s-1}}{1-Kc_1} + \frac{(Kc_1)^{s+1} \sigma^{s-1}}{(1-Kc_1)^2} + \frac{Kc_1(s(\sigma Kc_1)^{s-1}-1)}{\sigma Kc_1-1} - \frac{\sigma(Kc_1)^2((\sigma Kc_1)^{s-1}-1)}{(\sigma Kc_1-1)^2} - \frac{\sigma(Kc_1)^2((\sigma Kc_1)^{s-1}-1)}{(\sigma Kc_1-1)^2} \quad (S5)$$

In the meantime,  $\alpha_{\text{Agg. II}}$  can be calculated from equation (S6):

$$\alpha_{\text{Agg. II}} = 1 - \alpha_{\text{Mon}} = 1 - \frac{Kc_1}{Kc_T} \quad (S6)$$

Both  $\alpha_{\text{Agg. II}}$  and  $Kc_T$  can be obtained from the data of  $Kc_1$  and the curve of  $\alpha_{\text{Agg. II}}$  against  $Kc_T$  can be drawn. The experiment data from three different wavelengths were collected and manually fitted into the curve for the best match, the result presented in the paper was the average value.

#### 4. Aggregation studies

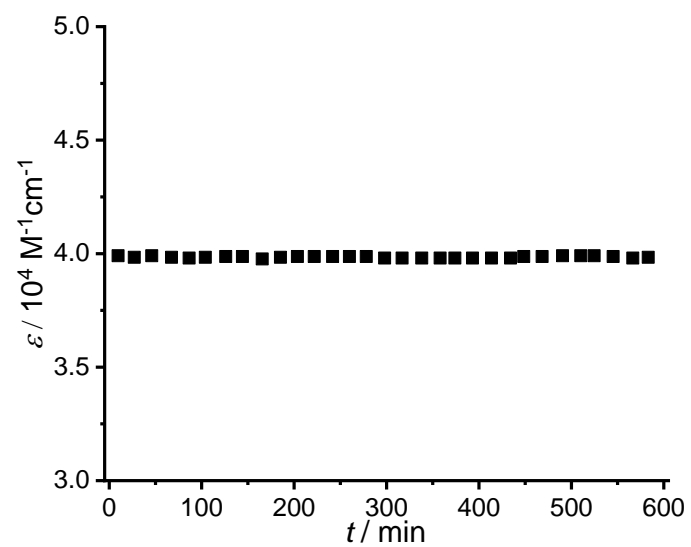

**Fig. S8** Time-dependent UV/Vis absorption spectral changes in  $\epsilon$  of **Agg. I** in  $\text{H}_2\text{O}$  ( $2.0 \times 10^{-5} \text{ M}$ ) monitored at wavelength of 520 nm at 275 K.



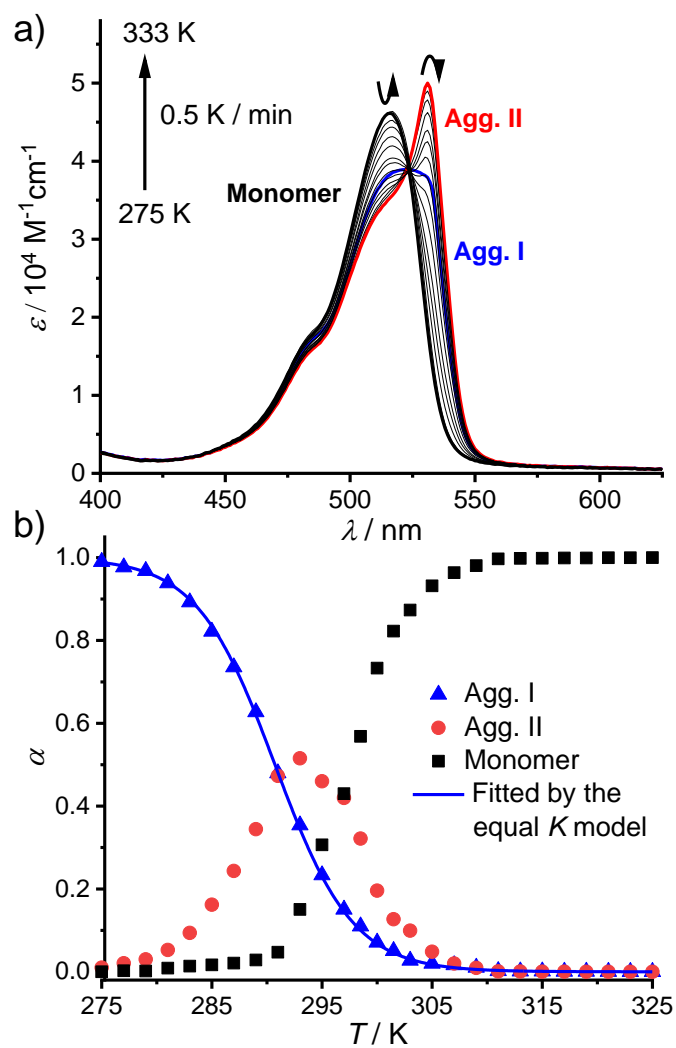

**Fig. S9** a) Temperature-dependent UV/Vis absorption spectra of **Agg. I** ( $c_T = 2.0 \times 10^{-5} \text{ M}$ ) heating from 275 K to 333 K at  $0.5 \text{ K min}^{-1}$ . b) Plot of the calculated molar fraction of monomer, **Agg. I** and **Agg. II** in the heating process of **Agg. I** from 275 K to 333 K at  $0.5 \text{ K min}^{-1}$ , and the fitting curves by the equal K mode. The values of  $\alpha_{\text{Agg. I}}$  and  $\alpha_{\text{Agg. II}}$  were estimated based on the spectral data by the method in our previous work.<sup>4</sup>

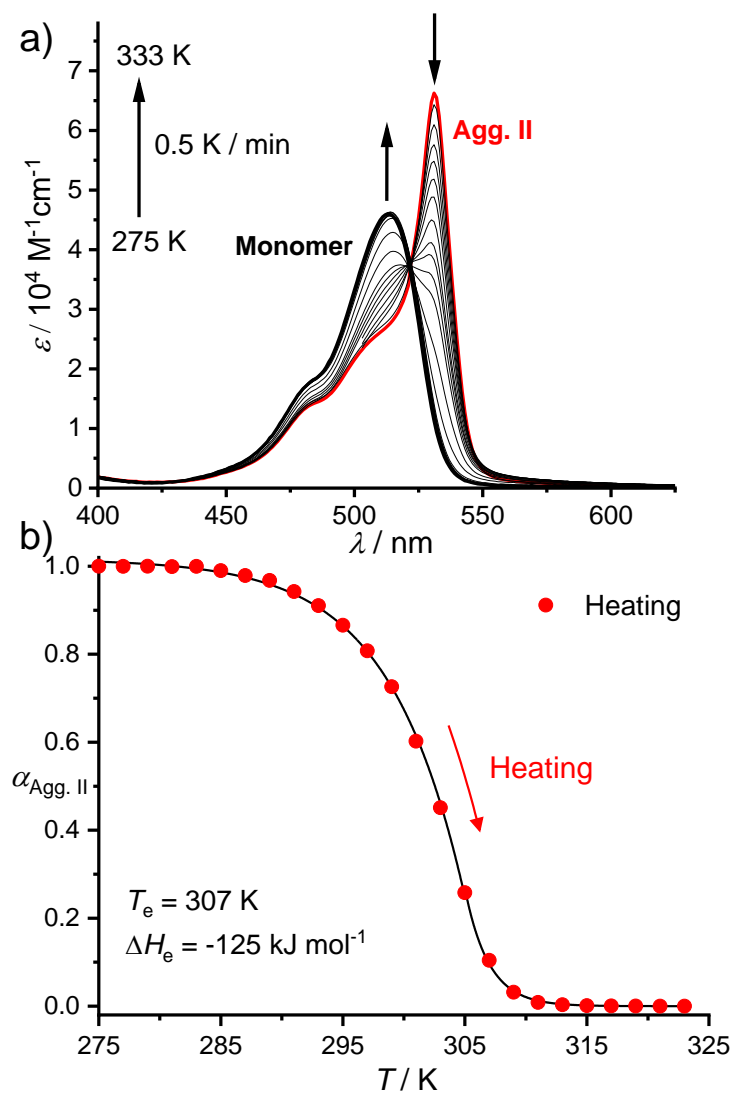

**Fig. S10** a) Temperature-dependent UV/Vis absorption spectra of **Agg. II** ( $c_T = 2.0 \times 10^{-5} \text{ M}$ ) heating from 275 K to 333 K at 0.5 K min<sup>-1</sup>. b) Plot of the molar fraction of **Agg. II** ( $c_T = 2.0 \times 10^{-5} \text{ M}$ ) versus temperature for the heating process and the fitting curves by the nucleation-elongation mode.

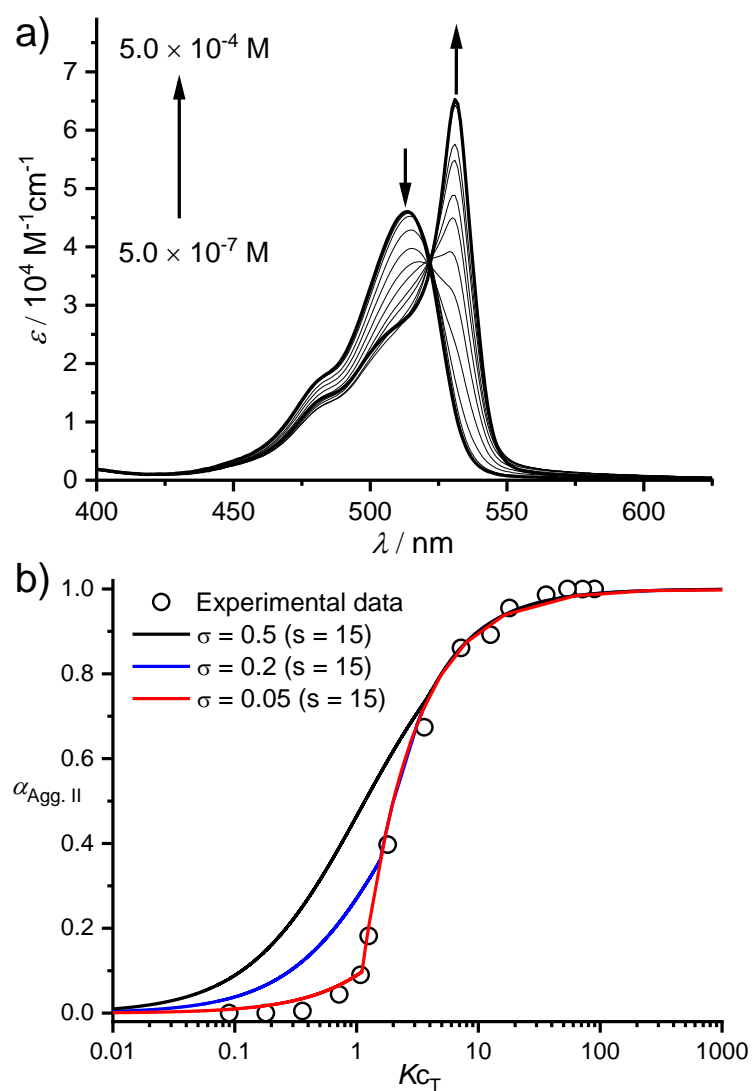

**Fig. S11** a) Concentration-dependent UV/Vis absorption spectra of dye **3** in H<sub>2</sub>O with concentration increasing from  $5.0 \times 10^{-7}$  M to  $5.0 \times 10^{-4}$  M. b) Plot of  $\alpha_{\text{agg}}$  versus  $KC_T$  with various  $\sigma$  and  $s$  values according to Goldstein and Stryer's model and the fitting of experimental data of dye **3** at 531 nm (circles) from concentration-dependent UV/Vis absorption spectra to the calculated curves.

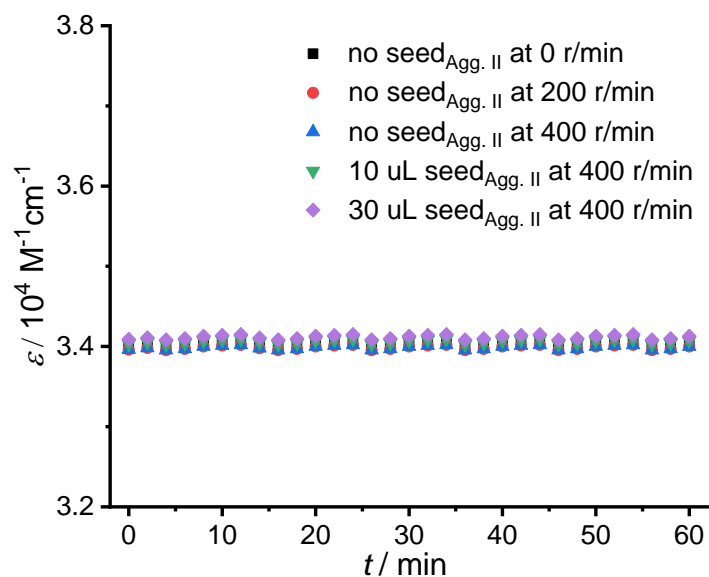

**Fig. S12** Changes of the  $\epsilon$  value at 531 nm in time-dependent UV/Vis absorption change of **Agg. I** in  $\text{H}_2\text{O}$  ( $c_T = 2.0 \times 10^{-5}$  M) at 275 K under the different amount of seed<sub>Agg. II</sub> and stirring rate.

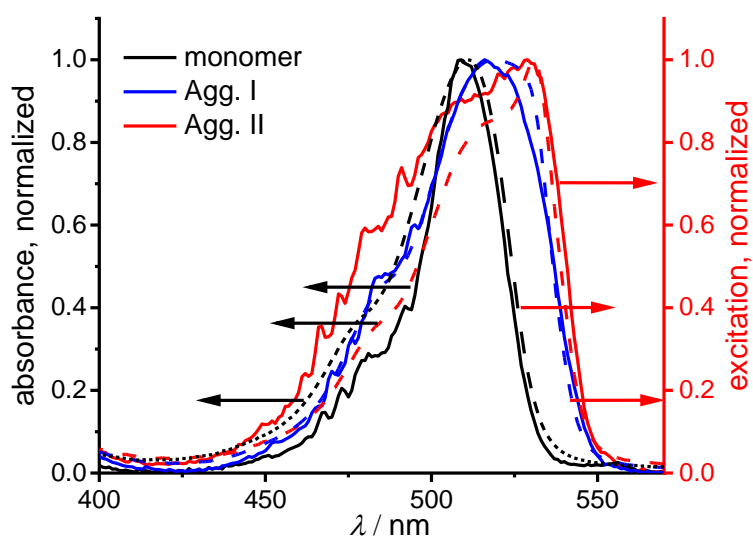

**Fig. S13** Excitation spectra of monomer ( $c_T = 1.0 \times 10^{-6}$  M, black solid line), and **Agg. I** ( $c_T = 1.0 \times 10^{-5}$  M, blue solid line) and **Agg. II** ( $c_T = 1.0 \times 10^{-5}$  M, red solid line) in  $\text{H}_2\text{O}$  ( $\lambda_{em} = 610$  nm) compared to absorption spectra of monomer ( $c_T = 1.0 \times 10^{-6}$  M, black dotted line), and **Agg. I** ( $c_T = 1.0 \times 10^{-5}$  M, blue dotted line) and **Agg. II** ( $c_T = 1.0 \times 10^{-5}$  M, red dotted line) in  $\text{H}_2\text{O}$ .

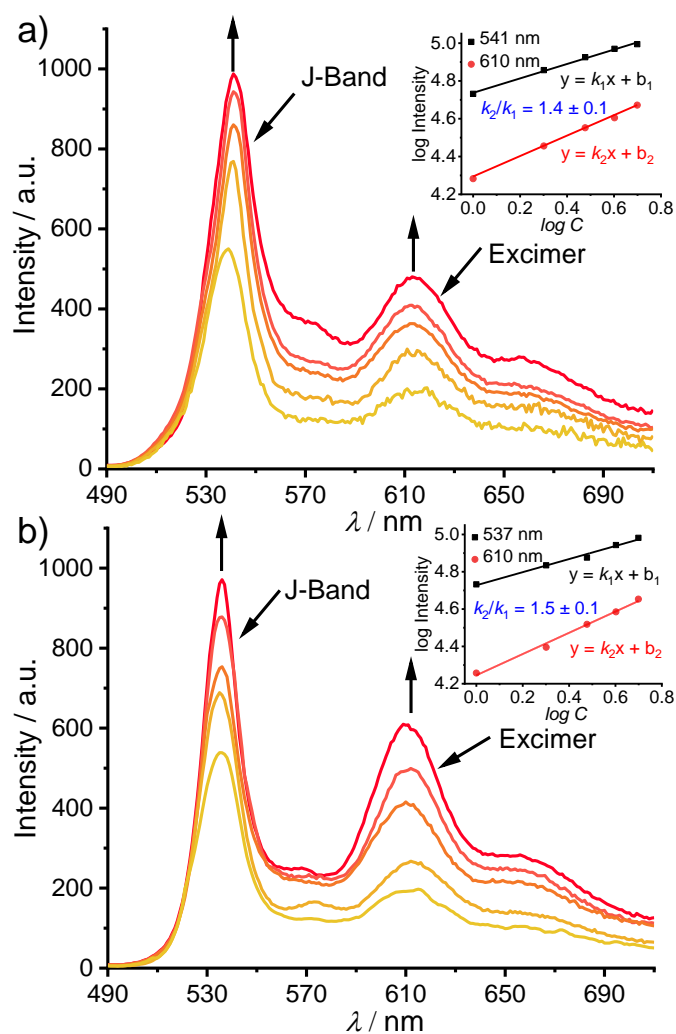

**Fig. S14** a) Fluorescence intensity of **Agg. II** in H<sub>2</sub>O with increasing concentration of the dye from  $1.0 \times 10^{-5}$  M to  $5.0 \times 10^{-5}$  M ( $\lambda_{\text{ex}} = 480$  nm). Inset: Concentration-dependent of the emissive intensity of the excimer band (red symbol) and J-band (black symbol), and the solid lines were their linear fits. b) Fluorescence intensity of **Agg. I** in H<sub>2</sub>O with increasing concentration of the dye from  $1.0 \times 10^{-5}$  M to  $5.0 \times 10^{-5}$  M ( $\lambda_{\text{ex}} = 480$  nm). Inset: Concentration-dependent of the emissive intensity of the excimer band (red symbol) and J-band (black symbol), and the solid lines were their linear fits.

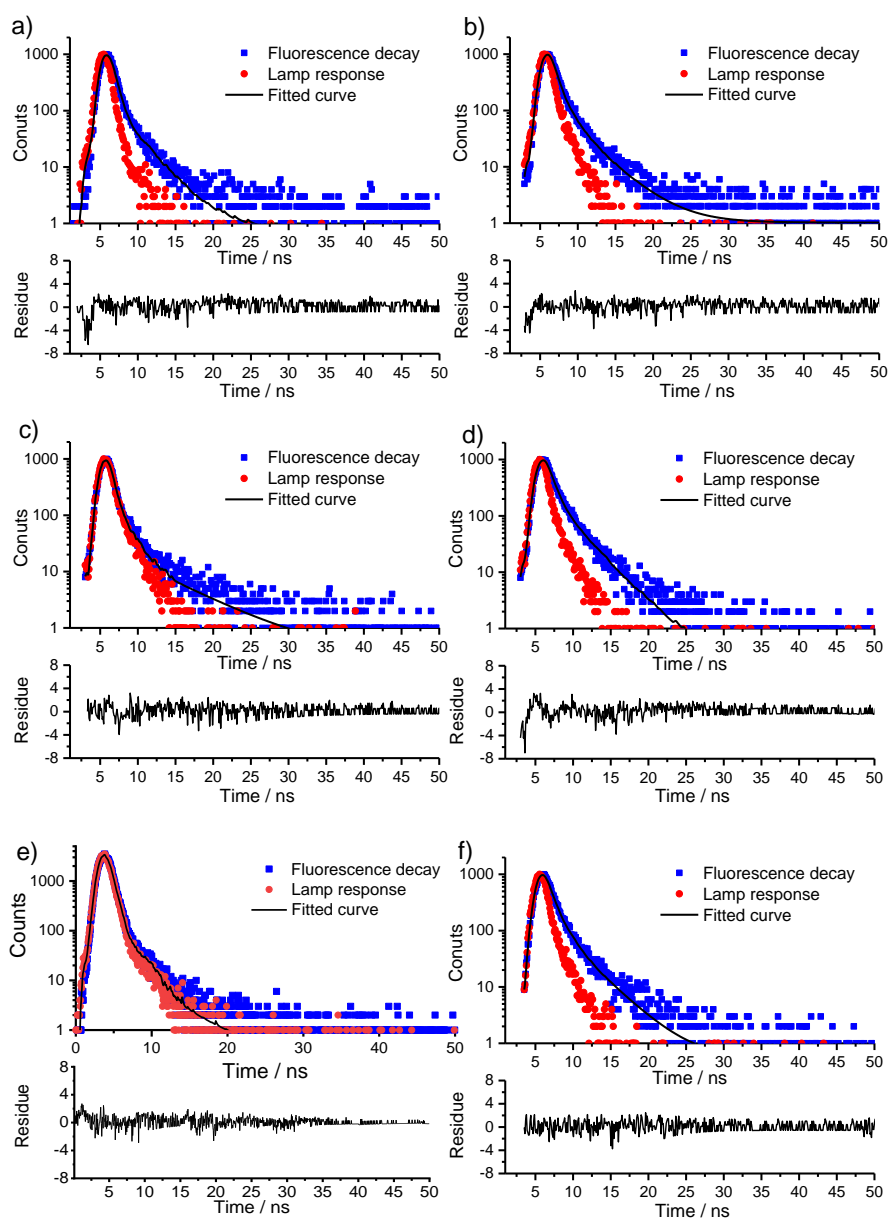

**Fig. S15** a) Fluorescence decay of monomer of dye **3** in H<sub>2</sub>O ( $c_T = 1.0 \times 10^{-6}$  M,  $\lambda_{ex} = 366$  nm,  $\lambda_{detection} = 530$  nm) at 275 K. b) Fluorescence decay of monomer of dye **3** in H<sub>2</sub>O ( $c_T = 1.0 \times 10^{-6}$  M,  $\lambda_{ex} = 366$  nm,  $\lambda_{detection} = 610$  nm) at 275 K. c) Fluorescence decay of **Agg. I** of dye **3** in H<sub>2</sub>O ( $c_T = 2.0 \times 10^{-5}$  M,  $\lambda_{ex} = 366$  nm,  $\lambda_{detection} = 537$  nm) at 275 K. d) Fluorescence decay of **Agg. I** of dye **3** in H<sub>2</sub>O ( $c_T = 2.0 \times 10^{-5}$  M,  $\lambda_{ex} = 366$  nm,  $\lambda_{detection} = 610$  nm) at 275 K. e) Fluorescence decay of **Agg. II** of dye **3** in H<sub>2</sub>O ( $c_T = 2.0 \times 10^{-5}$  M,  $\lambda_{ex} = 366$  nm,  $\lambda_{detection} = 541$  nm) at 275 K. f) Fluorescence decay of **Agg. II** of dye **3** in H<sub>2</sub>O ( $c_T = 2.0 \times 10^{-5}$  M,  $\lambda_{ex} = 366$  nm,  $\lambda_{detection} = 610$  nm) at 275 K.

**Table S1** Fluorescence lifetimes of dye **3** monomer, **Agg. I** and **Agg. II** in H<sub>2</sub>O<sup>[a]</sup>

|                | $\tau_1 / \text{ns } (\%)^{[b]}$ | $\tau_2 / \text{ns } (\%)^{[b]}$ | $\tau / \text{ns } ^{[c]}$ | $\chi^2$ |
|----------------|----------------------------------|----------------------------------|----------------------------|----------|
| Monomer        | 0.46 (85.17%)                    | 3.01 (14.83%)                    | 0.84                       | 1.008    |
| <b>Agg. I</b>  | 0.20 (96.19%)                    | 6.50 (3.81%)                     | 0.44                       | 1.009    |
| <b>Agg. II</b> | 0.18 (98.02%)                    | 5.43 (1.98%)                     | 0.28                       | 1.003    |

[a] Monitored at the emission maximum

[b] Components of bi-exponential fluorescence lifetimes and pre-exponential factors (in brackets)

[c] Averaged fluorescence lifetime

**Table S2** Fluorescence lifetimes of excimer in H<sub>2</sub>O<sup>[a]</sup>

|                | $\tau_1 / \text{ns } (\%)^{[b]}$ | $\tau_2 / \text{ns } (\%)^{[b]}$ | $\tau / \text{ns } ^{[c]}$ | $\chi^2$ |
|----------------|----------------------------------|----------------------------------|----------------------------|----------|
| Monomer        | 0.57 (67.83%)                    | 6.85 (32.17%)                    | 2.6                        | 1.027    |
| <b>Agg. I</b>  | 0.64 (73.22%)                    | 3.27 (26.78%)                    | 1.3                        | 1.019    |
| <b>Agg. II</b> | 0.55 (77.22%)                    | 3.27 (22.78%)                    | 1.1                        | 1.004    |

[a] Monitored at 610 nm

[b] Components of bi-exponential fluorescence lifetimes and pre-exponential factors (in brackets)

[c] Averaged fluorescence lifetime

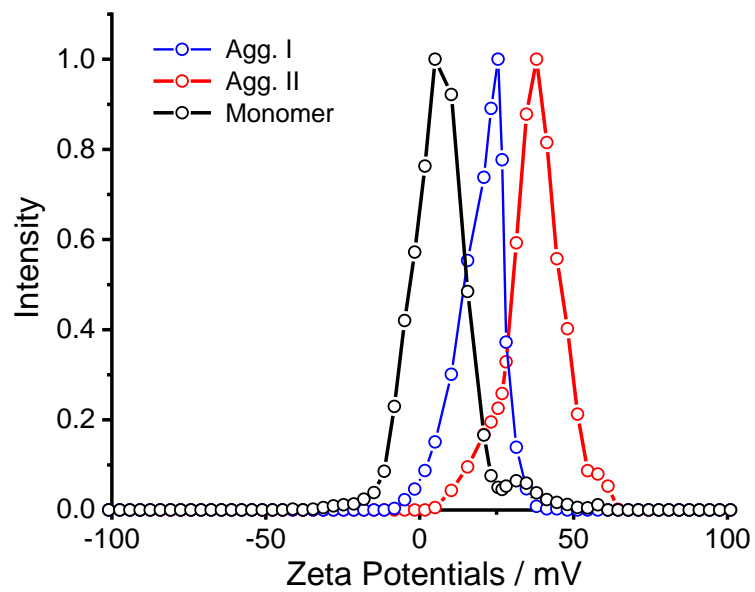

**Fig. S16** Zeta Potentials of monomer, **Agg. I** and **Agg. II** in H<sub>2</sub>O.



## 5. References

1. I. Botev, *Fresenius Z. Anal. Chem.*, 1979, **297**, 419-419.
2. P. Jonkheijm, P. van der Schoot, A. P. H. J. Schenning and E. W. Meijer, *Science*, 2006, **313**, 80-83.
3. R. F. Goldstein and L. Stryer, *Biophys. J.*, 1986, **50**, 583-599.
4. Z. Chen, Y. Liu, W. Wagner, V. Stepanenko, X. Ren, S. Ogi and F. Würthner, *Angew. Chem. Int. Ed.*, 2017, **56**, 5729-5733.
